# Supplementary material
Source: publisher figshare collection journal article supplement (https://tandf.figshare.com/articles/dataset/_/3505454)
Supplement: Supplementary file 1 [file 1]

Archive with 3 entries (3 files):
- FigS1.pdf
- Fig_S2.tif
- Suppl_Material_Fig. captions_LE.docx
