# Supplementary material
Source: publisher figshare collection journal article supplement (https://tandf.figshare.com/articles/dataset/_/3505454)

# Oligomerized backbone pilin helps piliated *Lactococcus lactis* to withstand shear flow, Castelain *et al.*

Figures S1: Types of motion under shear flow

bare polystyrene

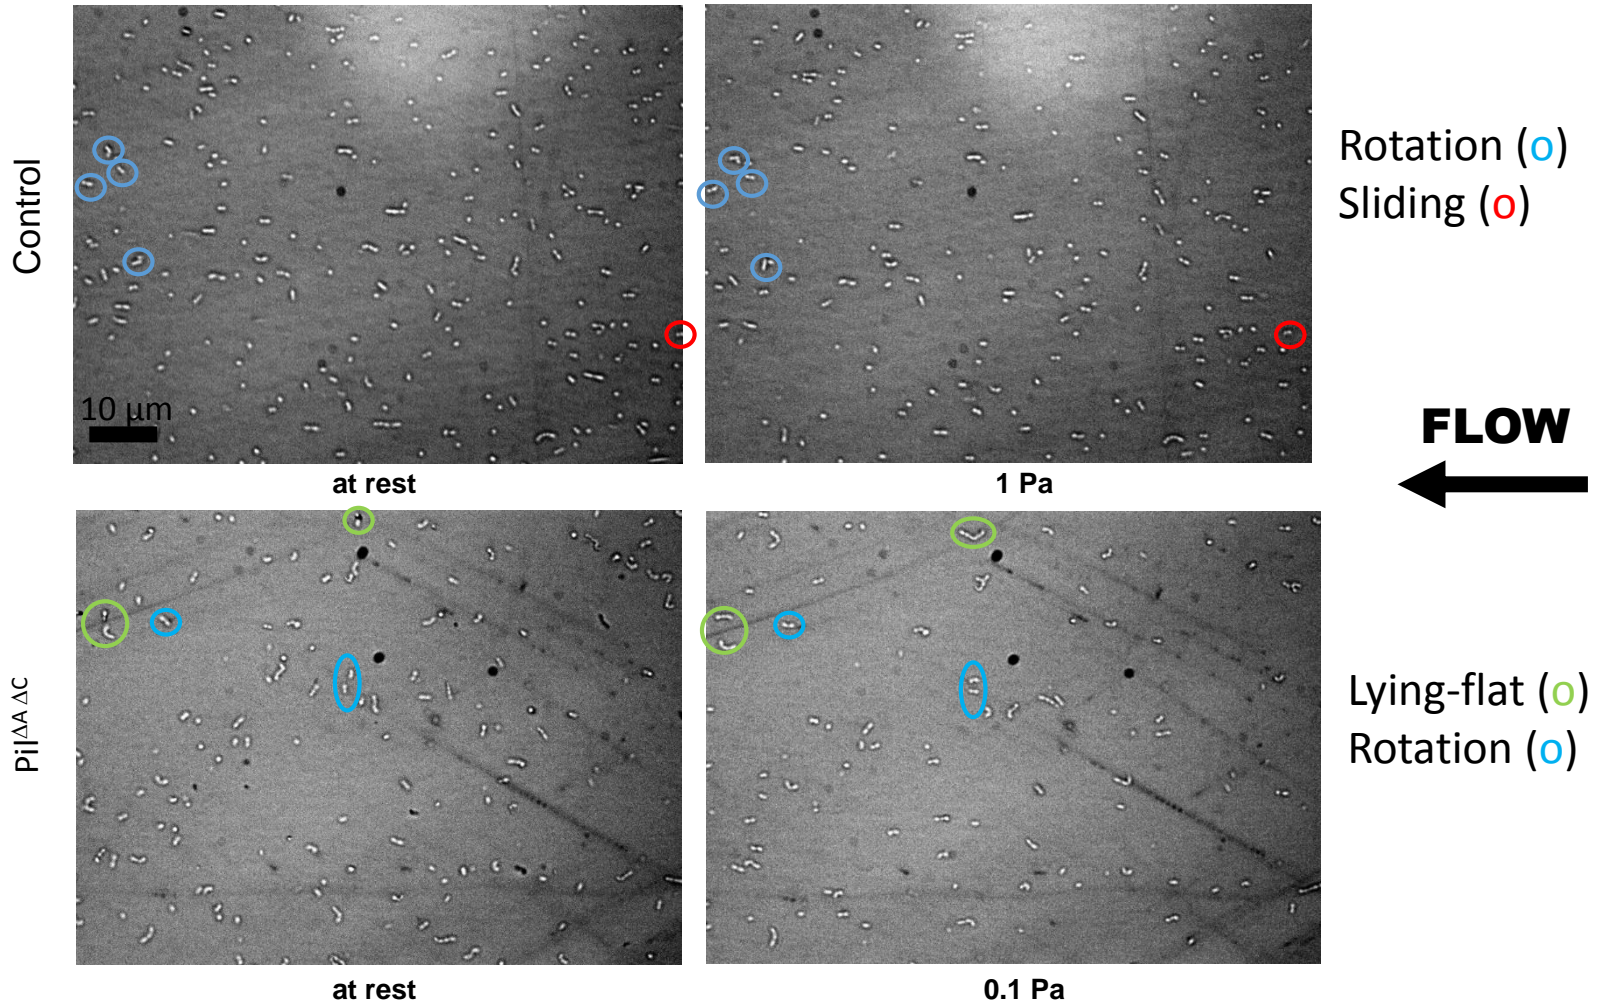

**Oligomerized backbone pilin helps pilated *Lactococcus lactis* to withstand shear flow, Castelain *et al.***

**Figures S1:** Types of motion under shear flow

**bare polystyrene**

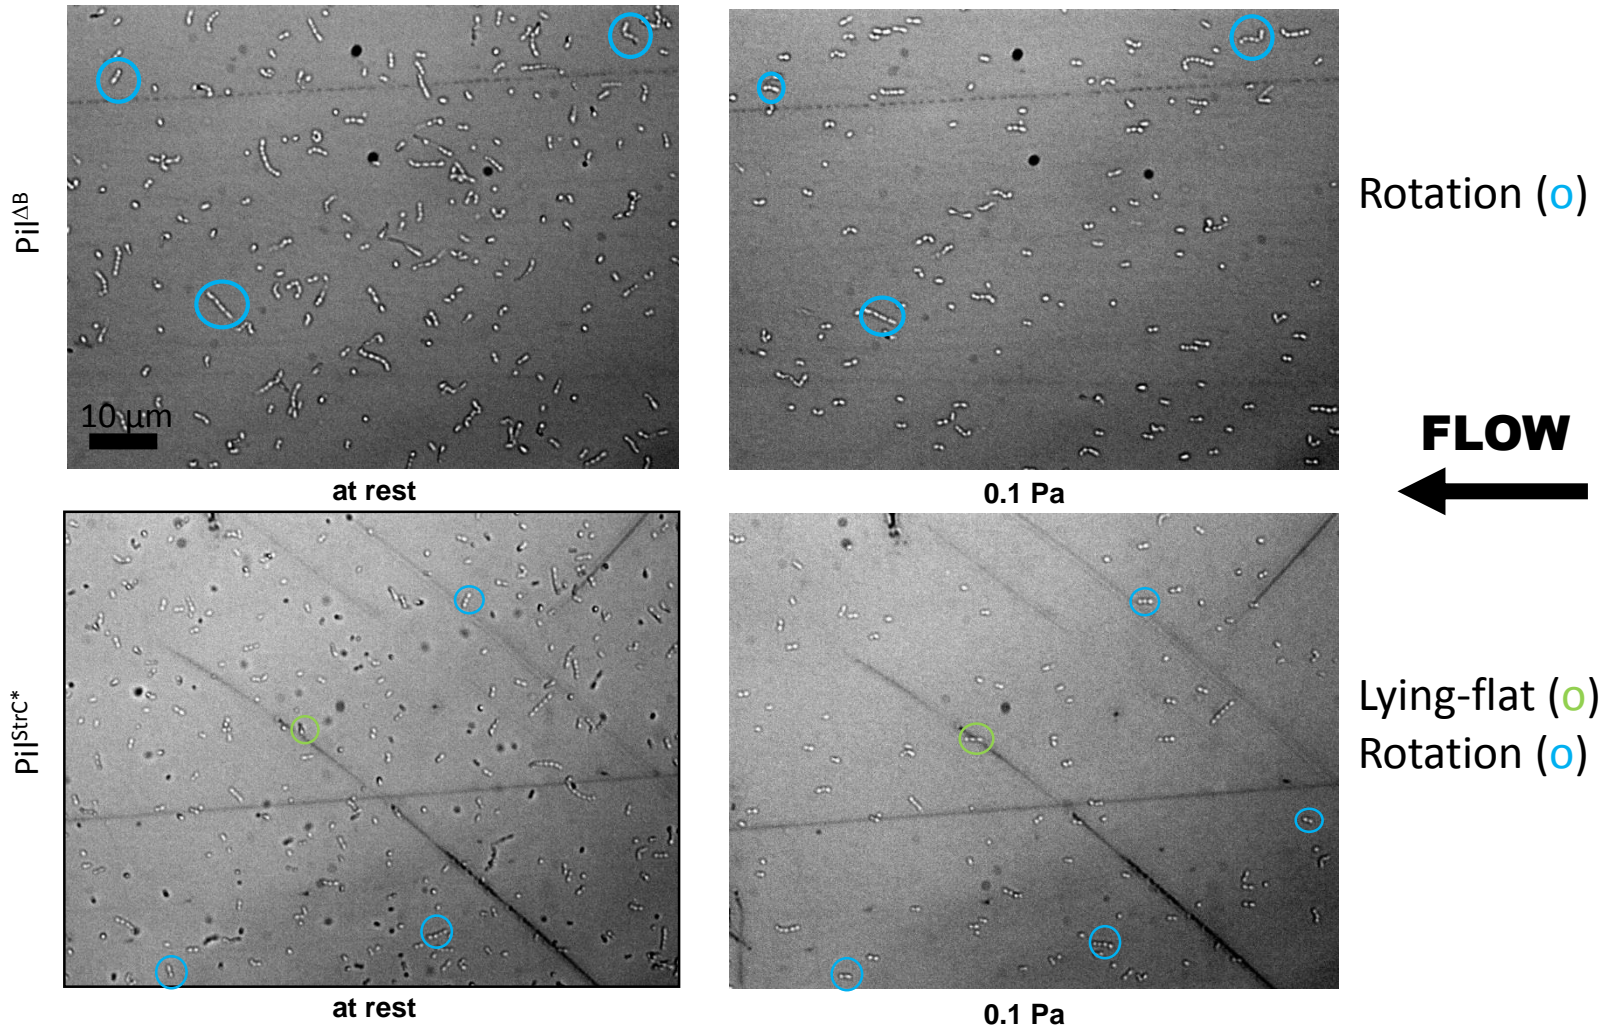

**Oligomerized backbone pilin helps piliated *Lactococcus lactis* to withstand shear flow, Castelain *et al.***

**Figures S1:** Types of motion under shear flow

**bare polystyrene**

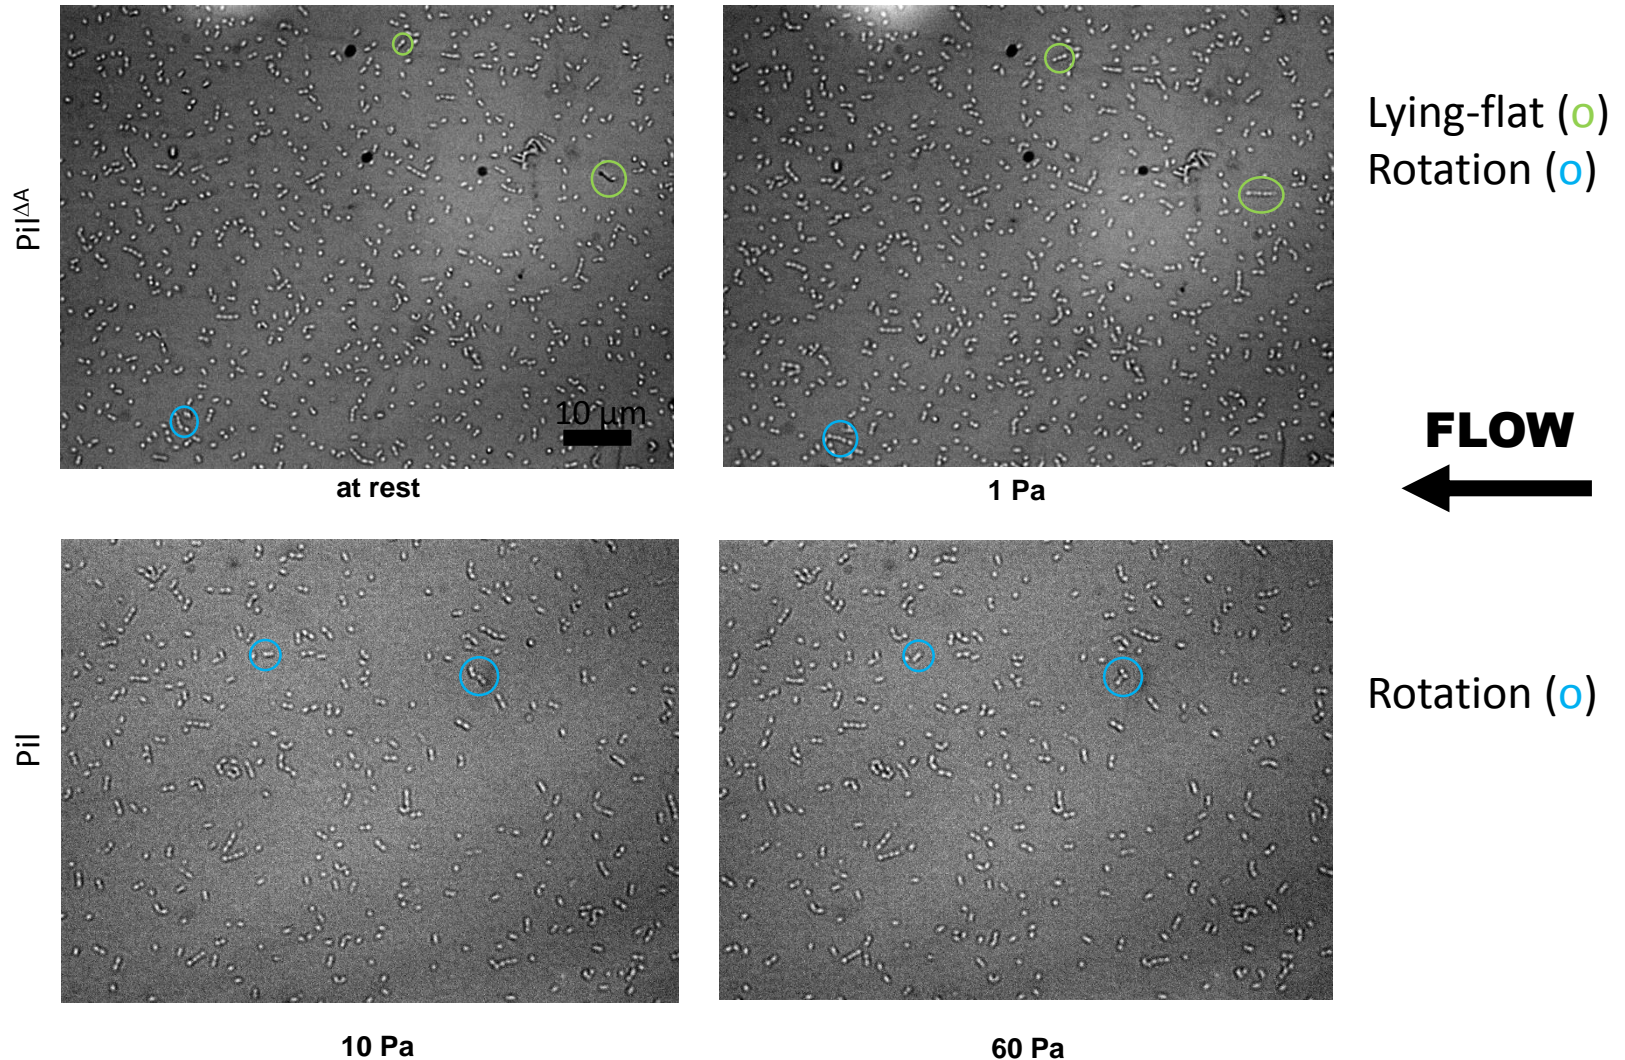

**Oligomerized backbone pilin helps piliated *Lactococcus lactis* to withstand shear flow, Castelain *et al.***

**Figures S1:** Types of motion under shear flow

**bare polystyrene**

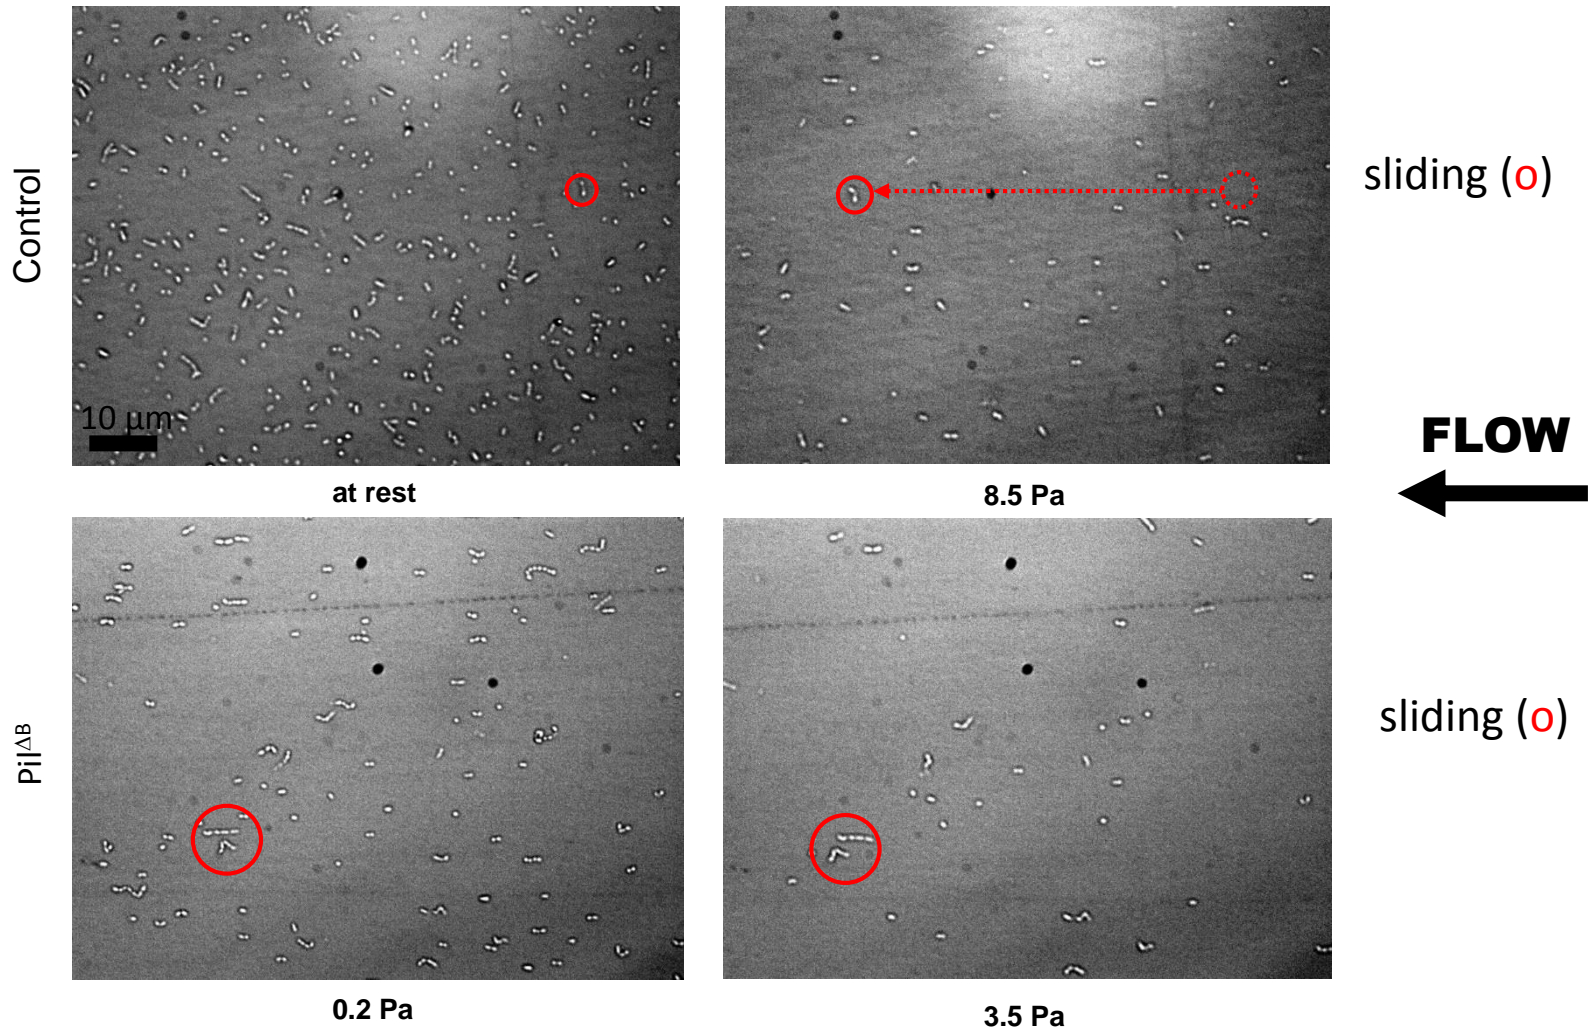

**Oligomerized backbone pilin helps piliated *Lactococcus lactis* to withstand shear flow, Castelain *et al.***

**Figure S1:** Types of motion under shear flow

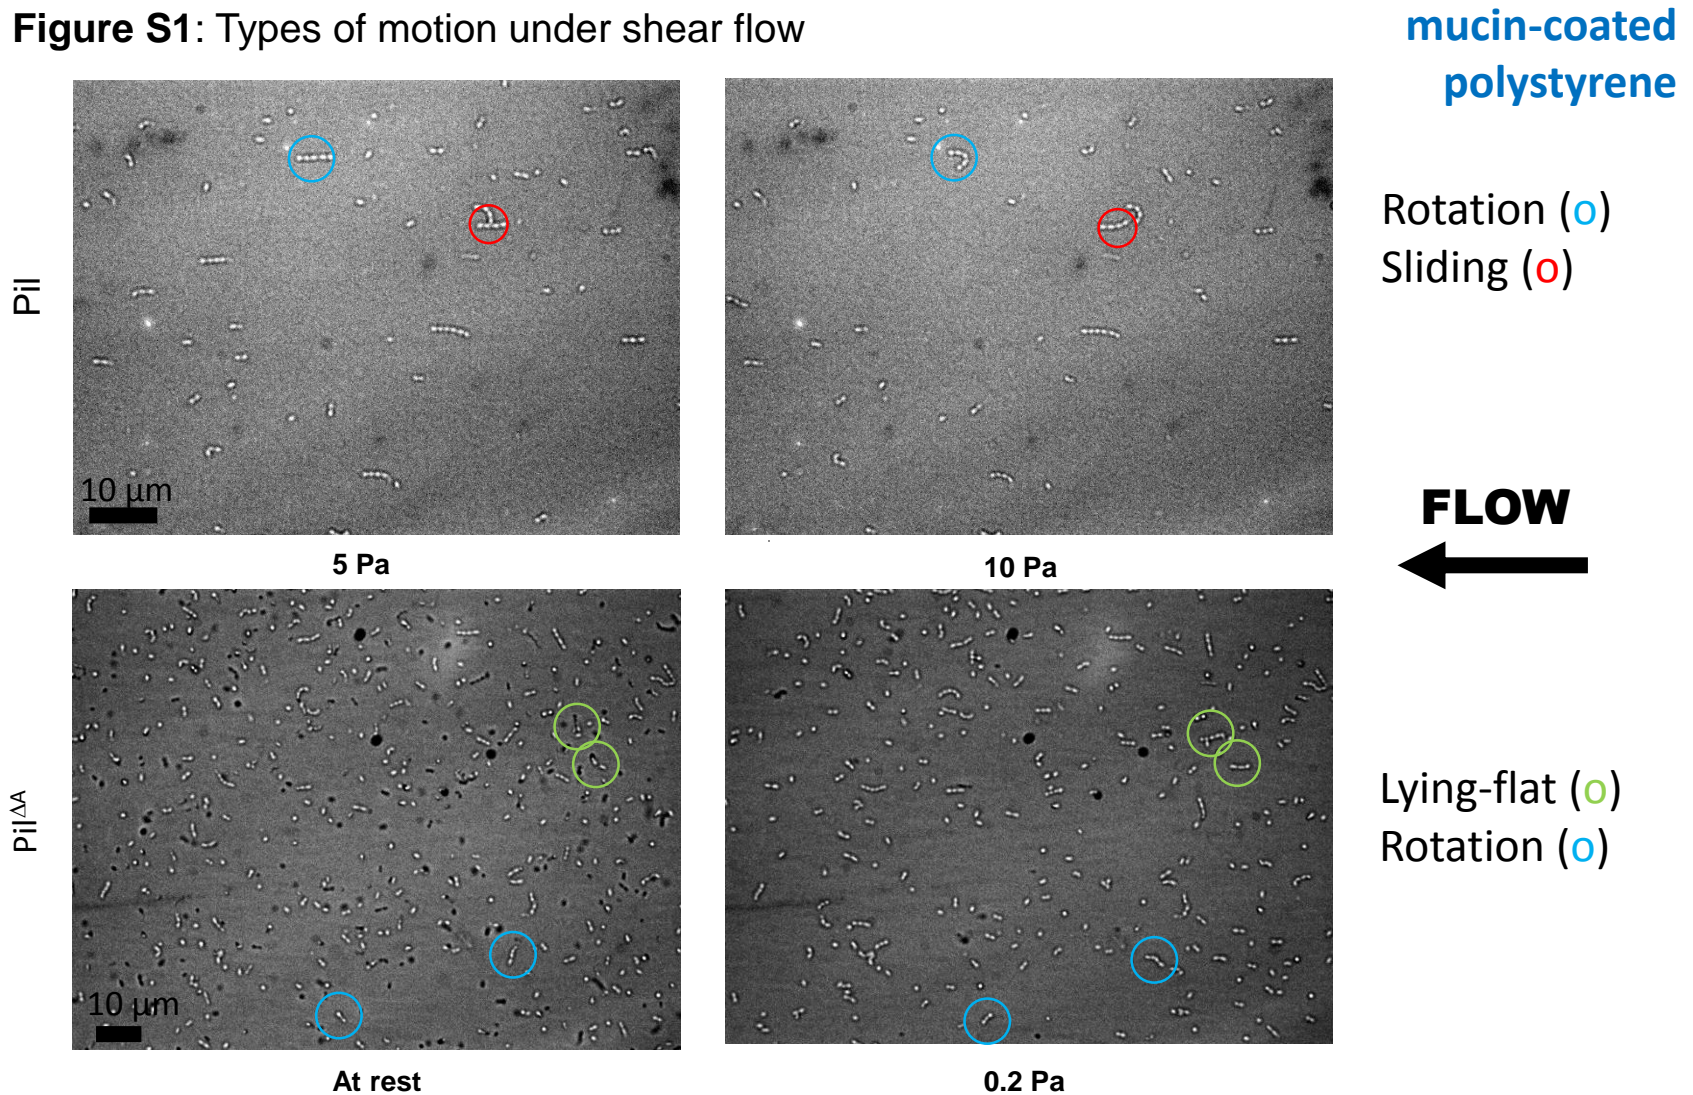

**Oligomerized backbone pilin helps pilated *Lactococcus lactis* to withstand shear flow, Castelain *et al.***

**Figures S1:** Types of motion under shear flow

mucin-coated  
polystyrene

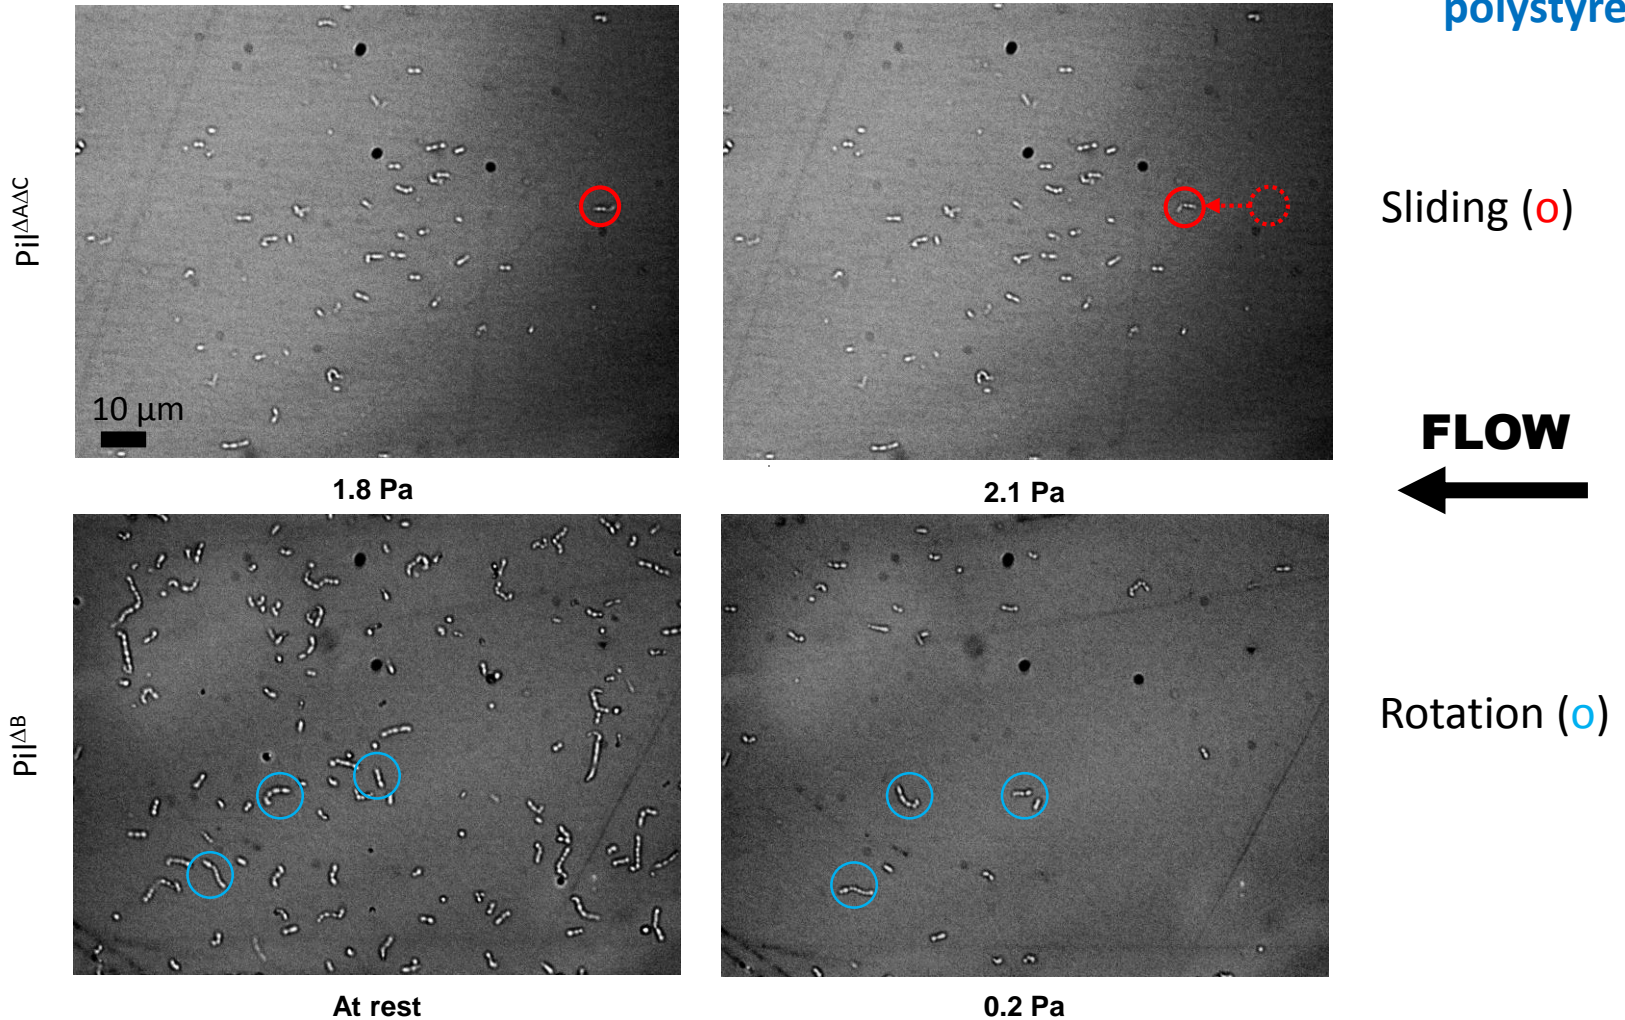

**Oligomerized backbone pilin helps piliated *Lactococcus lactis* to withstand shear flow, Castelain *et al.***

**Figures S1:** Types of motion under shear flow

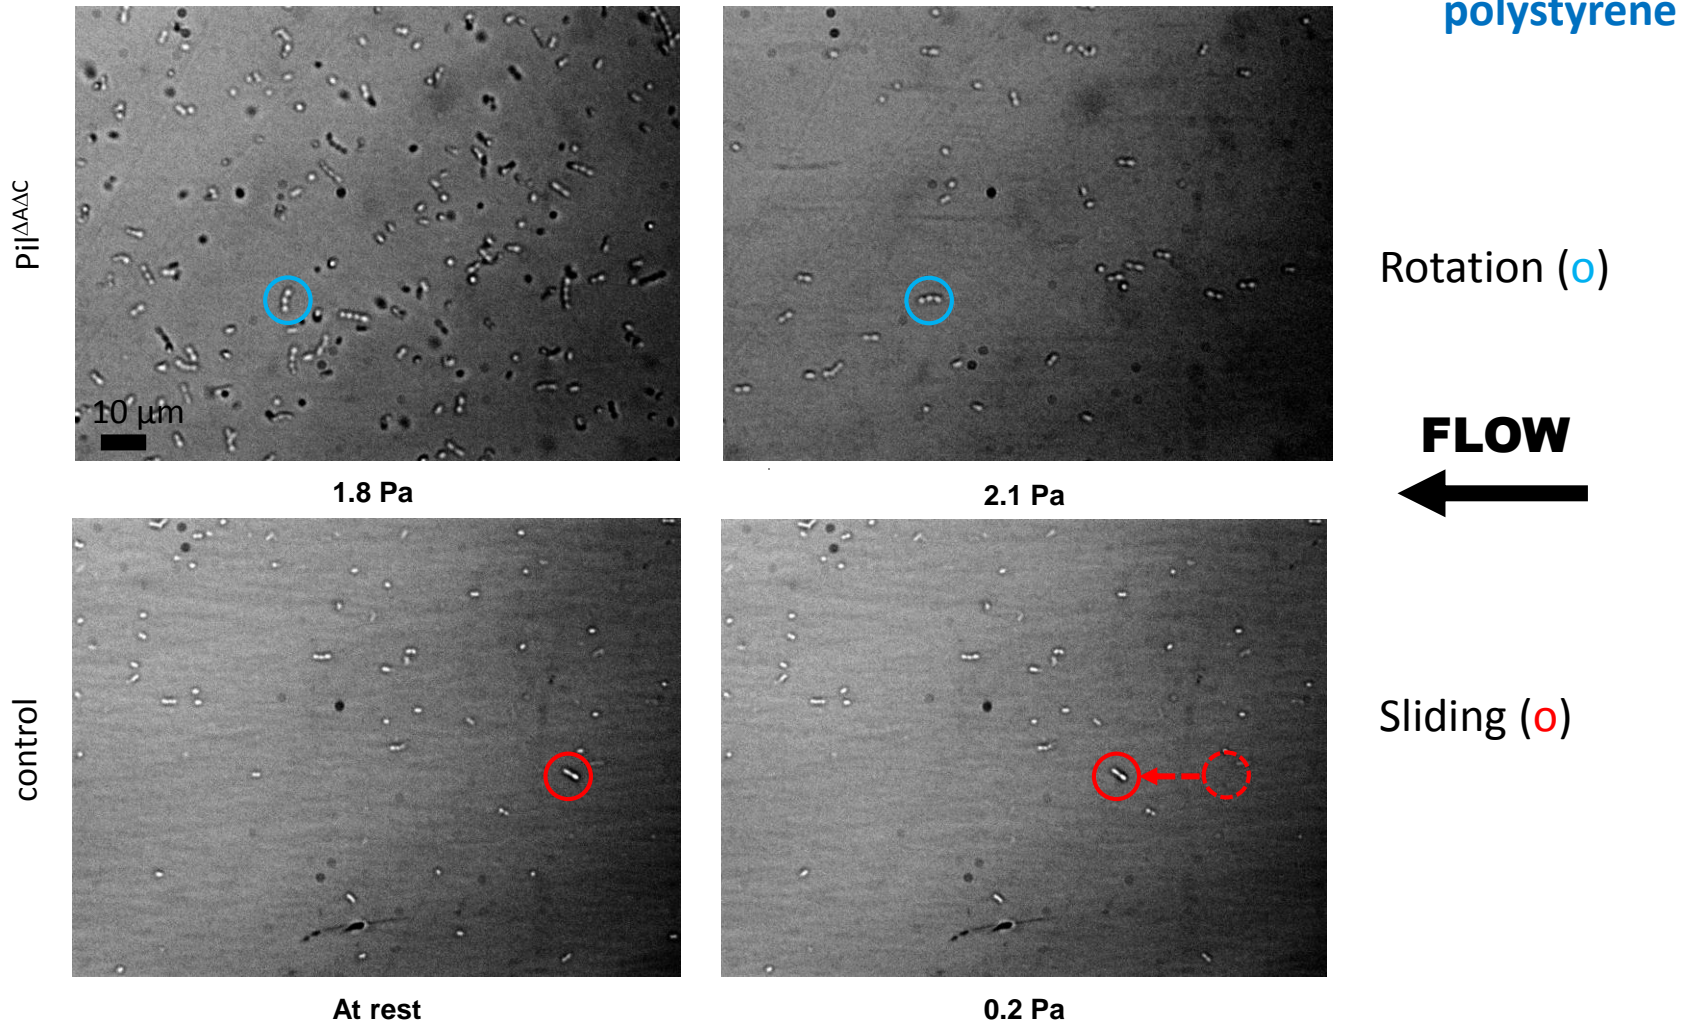

Supplement: Supplementary file 1 [file 1 › FigS1.pdf]
