# Supplementary material
Source: publisher figshare collection journal article supplement (https://tandf.figshare.com/articles/dataset/_/3505454)
Supplement: Supplementary file 1 [file 1 › Suppl_Material_Fig. captions_LE.docx]

# Supplemental material

**Figure S1**: Dataset providing examples identifying the different types of motion of lactococci (all the strains under study) under shear flow on bare and mucin-coated polystyrene surfaces. Supplementary data of Figure 4.

**Figure S2**: Cell fraction of the bacterial population attached to (A, B) bare and (C, D) mucin-coated polystyrene per orientation angle α class versus wall shear stress *τ*w; Supplementary data of Figure 5: (A) Pil∆B and (B) PilSrtC* strains tested on bare polystyrene and (C) Pil and (D) Pil∆A strains tested on mucin-coated polystyrene .
